# Supplementary material for: Enabling Mobility: A Simulation Model of the Health Care System for Major Lower-Limb Amputees to Assess the Impact of Digital Prosthetics Services
Source: MDPI journal article supplement (doi:10.3390/systems11010022), 2023-01-03
Supplement: s1 [file s1]

Archive with 1 entries (1 files):
- systems-2062954-supplementary.pdf
